# Supplementary material for: Pharmacological and Genetic Disruption of C-Type Natriuretic Peptide (nppcl) Expression in Zebrafish (Danio rerio) Causes Stunted Growth during Development
Source: MDPI journal article supplement (doi:10.3390/ijms241612921), 2023-08-18
Supplement: s1 [file s1]

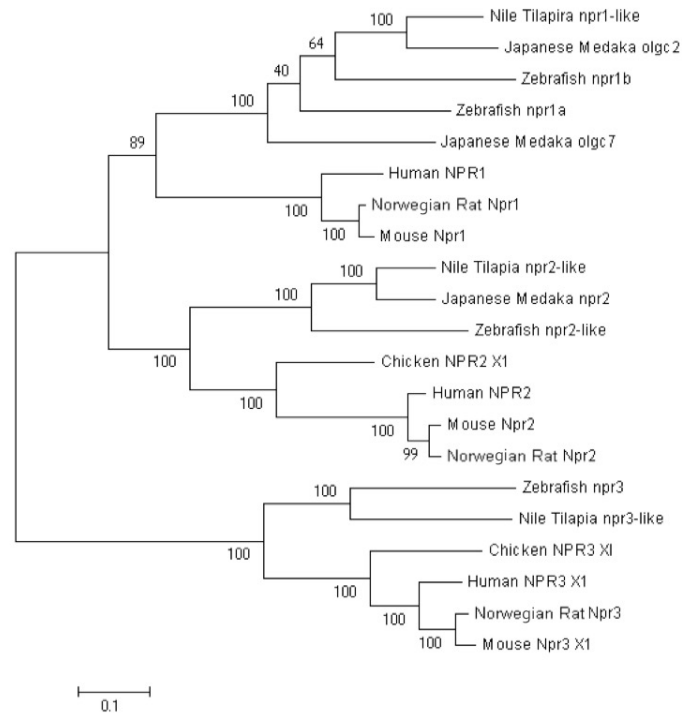

**Supplemental Figure S1 Phylogenetic tree of natriuretic peptide receptors including NPR1 (GC,A), NPR2 (GC-B) and NPR3** To examine the evolutionary relationships of zebrafish natriuretic peptide receptors, multiple sequence alignments of published whole natriuretic peptide receptor sequences were aligned using Clustal Omega (<http://www.ebi.ac.uk/Tools/msa/clustalo>). Evolutionary genetic analysis was performed on the resulting alignment using MEGA5 (<http://megasoftware.net>) and a phylogenetic tree created using the maximum-likelihood method and Tamura-Nei substitution model. Nonparametric bootstrap sampling was performed (1000 replicates) alongside and shown as a percentage at each corresponding node. Scale bar represents a genetic distance of 0.1.

A\*

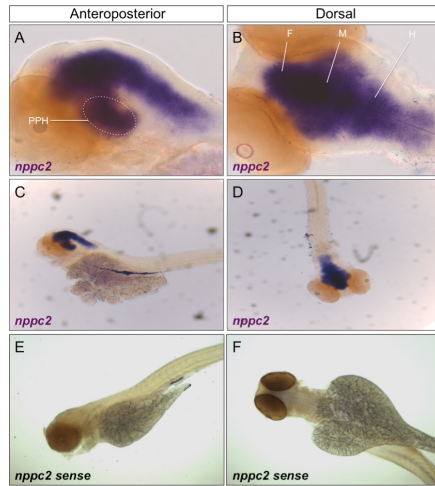

B\*

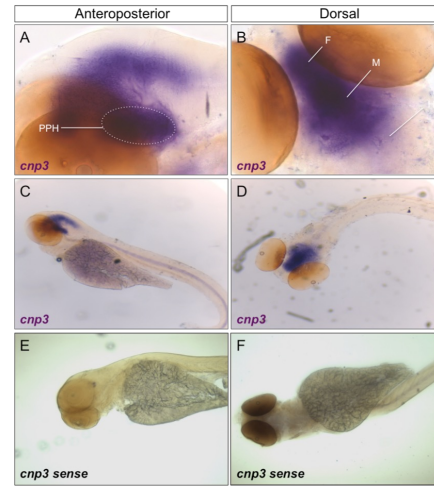

C\*

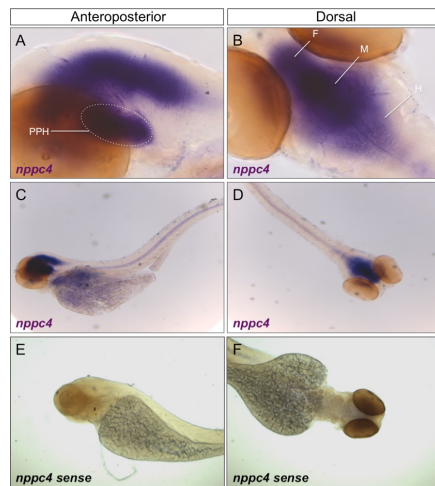

D\*

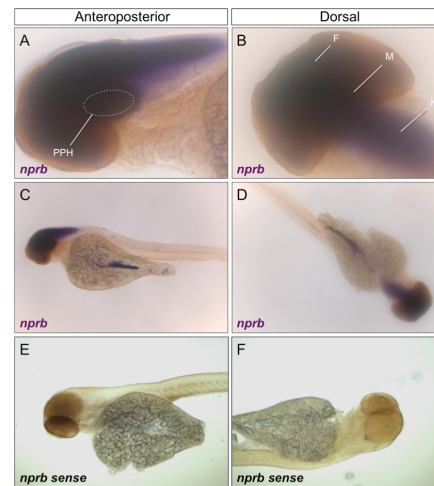

**Supplemental Figure S2A-D\*** Wholemount in situ hybridization of (A\*) *nppc2*, (B\*) *cnp3*, (C\*) *nppc4* and (D\*) *npr2* in 96hpf wild-type zebrafish embryos. Zebrafish embryos were captured at 96hpf and fixed with 4% PFA before wholemount in situ hybridization was performed to assess spatial expression of *nppc2*, *cnp3*, *nppc4* and *npr2* alongside sense probe controls. Images were captured at 20x (A,B) and 5x magnification (C-F) using bright field microscopy on an Axiovert 135 inverted microscope (Carl Zeiss Ltd, Cambridge, UK) and DC500 colour camera. *In situ* hybridization was performed using 12-15 embryos for each RNA probe and images are representative of the staining observed in multiple embryos. (PPH – presumptive pituitary and hypothalamus; F – forebrain; M – midbrain; H – hindbrain).

**ZF *nppcl* CDS:**

5' ATGCTGTGCTCATCTGTGTTTGTGGTGCTTCTTATCCTTTTGGCCAATCCCGTGCCGGGCAGCACCCGAGCCCTTCACACCTCTGACAAAGCCATGCAGGTCATTGAACAGTTCCTTGAGCGA  
TACAATGACCTTTTAACCCCTTGATGATCTTGAAAACCTCACAAAGTGACCAATCGGAAGAGCCCGTGACAGCCTTCAGCTCTGGGCTAAAGGTTGCAGAAT3' TACGACACGAGTAGACACAAACA  
CCACGAAGAATAGGAAAACCGGTTAGGGCACGGCCCGTCTGGGCTCGGGAAGTGTGGAGACTGTTTCGGTACGTCCAGTAACCTTGTCAGGAACCTCGCTATGTTACTGGAAAATTGGGAACCTAC  
TAGAACTTTTGGAGTGTTCACCTGGTTAGCCTTCTCGGGCACGTCTGGAAGTCGAGACCCGATTTCCAACGTCTTA5' ATCCCAAGTGGATTGACATACCGGTGCAGAATGAGAATGCCTGGCTCC  
GGCTTTTAAAGGGGGCTTTGGCCAATCAGAAACGAGCTCCACCGGATCGGTTGCGGAGGGGGTGAACCGAGGCTGTTTGGCTTGAAACTGGACCGGATCGGCTCTATGAGTGGCTCGGCTGC  
TAA3' TAGGGTTCACCTAACTGTATGGCCACGTCTTACTCTTACGGACCGAGGCCGAAAATTTCCCCCGAAACCGGTTAGTCTTTGCTCGAGGTGGCCTAGCCAACGCCCTCCCCACCTTGGCTC  
CGACAAAACCGAACTTTGACCTGGCCTAGCCGAGATACTACCGGAGCCGACGATT

**CRISPR Guide: GGCTCGGGTGCTGCCCGGCA**

Fwd oligonucleotide: 5' TAGGCTCGGGTGCTGCCCGGCA  
Common sequence: 3' GAGCCCACGACGGGCCGT  
Rvs sequence: 3' GAGCCCACGACGGGCCGTCAA  
Rvs oligonucleotide: 5' AAAGTGGCCGGCAGCACCCGAG

**Supplemental Figure S3** Design of CRISPR/Cas9 gRNA for targeting zebrafish *nppcl*. The whole genetic coding sequence for zebrafish *nppcl* (NM\_001161341) was inserted into the CRISPR design software E--CRISP (<http://www.e--crisp.org/E--CRISP/designcrisp.html>) and the MIT Optimized CRISPR design tool (<http://crispr.mit.edu>) using similar design parameters. The top scoring design sequences across from both design lists were then evaluated and the top scoring design present in both lists was selected. The target gRNA sequence is shown in the sequence above (blue) with the palindromic repeats at each end (red). Forward and reverse oligonucleotides designed are shown below along with the scoring output from the MIT Optimized CRISPR design tool.

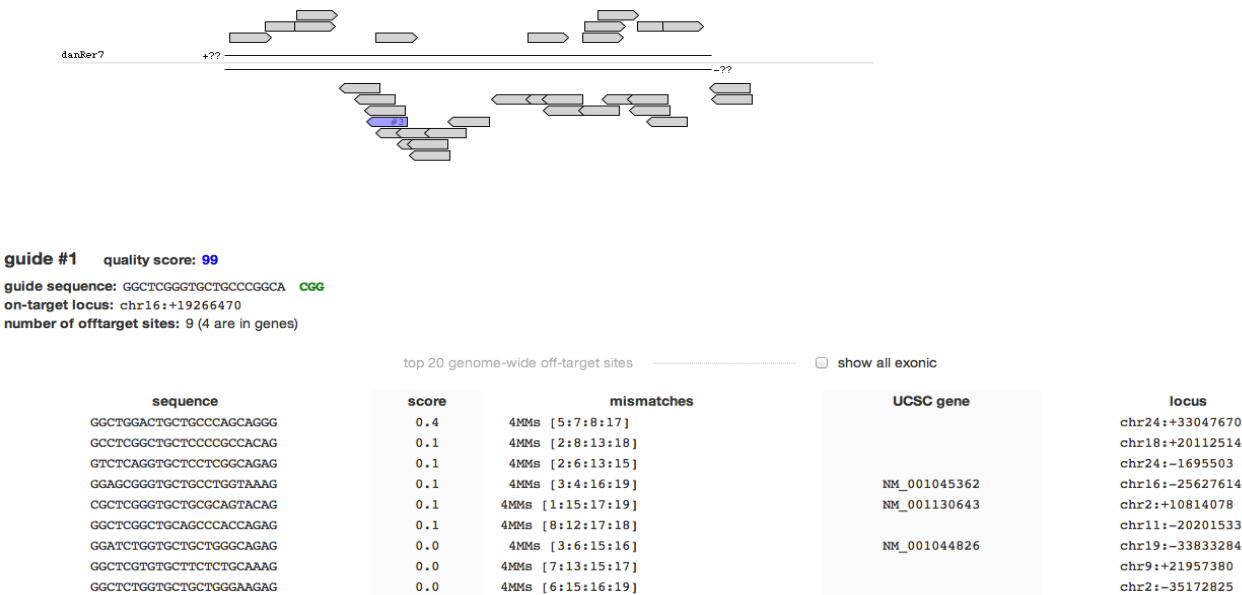

| Gene         | Accession Number | Forward primer (5'-3'), Reverse primer (3'-5') | Product Size (including universal tag) (bp) | Annealing Temperature (°C) |
|--------------|------------------|------------------------------------------------|---------------------------------------------|----------------------------|
| <i>nppcl</i> | NM_001161341     | TCCTAGCAGGTGCCAAAAAC<br>GGTCCAGTTTCAAGCCAAAA   | 602                                         | 60.2                       |
| <i>nppc4</i> | XM_003201148     | TTTGCTGGCTTGTGGACTTA<br>GAGAGTTGTTAATGGAGTGG   | 379                                         | 60.4                       |
| <i>nppc2</i> | XM_001919491     | TGGCTGCTTCATCATCTCTG<br>GTCCACCTTCATCCAAAAAC   | 332                                         | 56.4                       |
| <i>cnp3</i>  | NM_001128741     | GTGTCCTCGTTCTGCTTTT<br>CACGGGTGGATTAAAGAGG     | 557                                         | 60                         |
| <i>npra</i>  | XM_002666526     | ACCTCCTGTCCGTATGGA<br>CCTGACACCACCATATACGC     | 352                                         | 60                         |
| <i>npr1a</i> | NM_001044937     | CAGATGAGCAACACGGAGAA<br>TGATGCCAAAGCTGTAGACG   | 640                                         | 60                         |
| <i>nprb</i>  | GU076493         | GGGAGACCGTACAAGCAGAA<br>ACTCCATACGGGATGCTGTG   | 429                                         | 60                         |
| <i>nprc</i>  | NM_001102673     | ATTTTGCCGTGTTGAACTCC<br>ATCCCAGTCACCGCTGATAC   | 748                                         | 60.4                       |
| <i>nppa</i>  | NM_198800        | CCGGGGGACTAATTCTGAC<br>GAAGACCCTATGCGATCCAG    | 231                                         | 60                         |
| <i>nppb</i>  | XM_002663224     | AGTCGGCCTTCTTTCTCC<br>AGTTCTTCTGGGACCTGAGC     | 365                                         | 60.9                       |

**Table S1:** Custom oligonucleotide primers used for RT-PCR analyses and for construction of *in situ* hybridisation probes.

|    | Gene                            | Accession Number | Product Position (5'-3') (bp) | Forward primer (5'-3'), Reverse primer (3'-5')                                     | Product Size (including universal tag) (bp) |
|----|---------------------------------|------------------|-------------------------------|------------------------------------------------------------------------------------|---------------------------------------------|
| 1  | <i>furinβ</i>                   | NM_001045109     | 2528-2627                     | AGGTGACACTATAGAATACTCCGGAGAGAACGAGTGTC<br>GTACGACTCACTATAGGGAAATGCTGGGGGATTTTCTCT  | 137                                         |
| 2  | <i>nprb</i>                     | GU076493         | 2640-2746                     | AGGTGACACTATAGAATAACAGGTGGTGACATTGCTGA<br>GTACGACTCACTATAGGGAAAGACCACCATGTACGCATCA | 144                                         |
| 3  | <i>BNP</i>                      | XM_002663224     | 321-434                       | AGGTGACACTATAGAATAGCAGCCCGATACTTACCTGA<br>GTACGACTCACTATAGGGACCGATTCTGTCCAGTTTGCT  | 151                                         |
| 4  | <i>nppc2</i>                    | XM_001919491     | 778-898                       | AGGTGACACTATAGAATACTCCCTTGATTGGCTCCTG<br>GTACGACTCACTATAGGGACTGTCTGAGGATGCCAGCA    | 158                                         |
| 5  | <i>nppc4</i>                    | XM_003201148     | 89-216                        | AGGTGACACTATAGAATACCCAGAATCAGCATCTCCAT<br>GTACGACTCACTATAGGGACTGAGGGACCTCTGTTCCAGC | 165                                         |
| 6  | <i>18s</i>                      | NM_173234        | 122-256                       | AGGTGACACTATAGAATACCGCTATTAAGGGTGTGGA<br>GTACGACTCACTATAGGGAGGCGAGGGTTCTGCATAATA   | 172                                         |
| 7  | <i>nppa</i>                     | NM_198800        | 194-335                       | AGGTGACACTATAGAATAGGCATCAGAGAGACCCGTAG<br>GTACGACTCACTATAGGGACTGTGTGTCAAATCCATCCG  | 179                                         |
| 8  | <i>npr1a (both transcripts)</i> | NM_001044937     | 1389-1537                     | AGGTGACACTATAGAATAAAAAATGACAACCCCTGCCTG<br>GTACGACTCACTATAGGGAAGCTGAGCGGTCAACTCATT | 186                                         |
| 9  | <i>eef1a1l1</i>                 | NM_131263        | 1113-1268                     | AGGTGACACTATAGAATACTGAACCACCTGGTCAGAT<br>GTACGACTCACTATAGGGAATCTCCGGATTGAGAGCCT    | 193                                         |
| 10 | <i>nppcl</i>                    | NM_001161341     | 91-253                        | AGGTGACACTATAGAATAACACAGGATGGAGCAGGACT<br>GTACGACTCACTATAGGGACACCACTAATGCCAAGGGAT  | 200                                         |
| 11 | <i>nprc (both transcripts)</i>  | NM_001102673     | 2408-2578                     | AGGTGACACTATAGAATAGCAAGCCTTCCTGTATCCAA<br>GTACGACTCACTATAGGGAAGCGTCTGTACATGGCAGTG  | 208                                         |
| 12 | <i>furina</i>                   | NM_001045106     | 2081-2258                     | AGGTGACACTATAGAATAATCAAAAACGTGGCTGGAAC<br>GTACGACTCACTATAGGGAAGAACCGGGGTTACACTCT   | 215                                         |
| 13 | <i>cnp3</i>                     | NM_001128741     | 157-342                       | AGGTGACACTATAGAATAGTGAACAAGCCGTTTGAGGA<br>GTACGACTCACTATAGGGAGCGCTTGTATGTGGACAGTA  | 223                                         |
| 14 | <i>corin</i>                    | XM_005174157     | 2470-2664                     | AGGTGACACTATAGAATACTCCTGTTGTGAGACGCAAA<br>GTACGACTCACTATAGGGAGGCCTCCAGAAATCTCTTC   | 232                                         |
| 15 | <i>npra</i>                     | XM_002666526     | 127-331                       | AGGTGACACTATAGAATACCGTACCAGGTTGTGGACTT<br>GTACGACTCACTATAGGGAGGATCCTGAAGGTTTTGCAG  | 242                                         |

**Table S2:** Custom oligonucleotide primers used for multiplex RT-qPCR analyses

| Gene expression       | Exogenous CNP treatment | CRISPR <i>nppcl</i> -treatment |
|-----------------------|-------------------------|--------------------------------|
| <i>nppcl</i>          | Decreased               | Decreased                      |
| <i>nppc2</i>          | No change               | Increased                      |
| <i>cnp3</i>           | No change               | No change                      |
| <i>nppc4</i>          | Decreased/Increased     | Increased                      |
| <i>nppa</i>           | Increased               | Decreased                      |
| <i>bnp</i>            | No change               | Increased                      |
| <i>corin</i>          | Decreased/Increased     | No change                      |
| <i>furin a</i>        | Decreased               | Decreased                      |
| <i>furin b</i>        | No change               | No change                      |
| <i>npra</i>           | Increased/Decreased     | Decreased                      |
| <i>npr1a</i>          | Decreased/Increased     | No change                      |
| <i>nprb</i>           | Decreased               | No change                      |
| <i>nprc</i>           | No change               | Increased                      |
| Morphometric analyses | Exogenous CNP treatment | CRISPR <i>nppcl</i> -treatment |
| Head width            | Decreased               | Decreased                      |
| Body length           | Decreased               | Decreased                      |
| Eye diameter          | Decreased               | Decreased                      |

**Table S3.** Summary of gene expression and morphometric phenotypes in exogenous CNP treated zebrafish embryos and CRISPR *nppcl*-treated zebrafish embryos.
